# Supplementary material for: Synthesis and biological evaluation of β-lactams as potent antidiabetic agents
Source: Royal Society of Chemistry journal article supplement (doi:10.1039/d4nj02535k), 2024-01-01
Supplement: d4nj02535k1.pdf [file d4nj02535k1.pdf]

## Supporting Information

### Synthesis and Biological Evaluation of $\beta$ -lactams as Potent Antidiabetic Agents

Salma Shaheen,<sup>[a]</sup> Jahan Zaib Arshad,<sup>\*[b]</sup> Mansoor Haider,<sup>[c]</sup> Adnan Ashraf,<sup>[d]</sup> Muhammad Mahboob Ahmad,<sup>[e]</sup> Muhammad Ashfaq,<sup>[a]</sup> Mostafa A. Ismail,<sup>[f]</sup> Tayyaba Najam,<sup>\*[g]</sup> Syed Shoaib Ahmad Shah<sup>\*[h]</sup>

[a] S. Shaheen, M. Ashfaq

Institute of Chemistry, The Islamia University of Bahawalpur, 63100, Pakistan.

[b] Dr. J. Z. Arshad

Department of Chemistry, Government College Women University Sialkot, Kutchery Road, Sialkot, Pakistan

[c] M. Haider

Department of Poultry Sciences, Cholistan University of Veterinary and Animal Sciences, Bahawalpur, Pakistan.

[d] Dr. A. Ashraf

Department of Chemistry, The University of Lahore, Lahore, Pakistan.

[e] M. M. Ahmad

Institute of Chemical Sciences, Bahauddin Zakariya University, Multan, Pakistan.

[f] M. A. Ismail

Research Center for Advanced Materials Science (RCAMS), Chemistry Department, Faculty of Science, King Khalid University, P.O. Box 9004, Abha 61413, Saudi Arabia.

[g] Dr. T. Najam

Research and Development Division, SciTech International Pvt Ltd, G-10/1, Islamabad, Pakistan.

[h] Dr. S. S. A. Shah

Department of Chemistry, School of Natural Sciences, National University of Science and Technology, Islamabad, 44000, Pakistan

\*Correspondence should be addressed to: Dr. Jahan Zaib Arshad, Email:

jahanzaib.arshad@gcwus.edu.pk; Dr. Tayyaba Najam, Email:

tayyabanajam@outlook.com; Dr. Syed Shoaib Ahmad Shah, E-mail:

shoaib03ahmad@outlook.com

### Table of Contents

NMR Spectra

ESI-Mass Spectra

*In vivo* Antidiabetic Studies

Lipophilicity

Quantitative Estimate of Drug-likeness

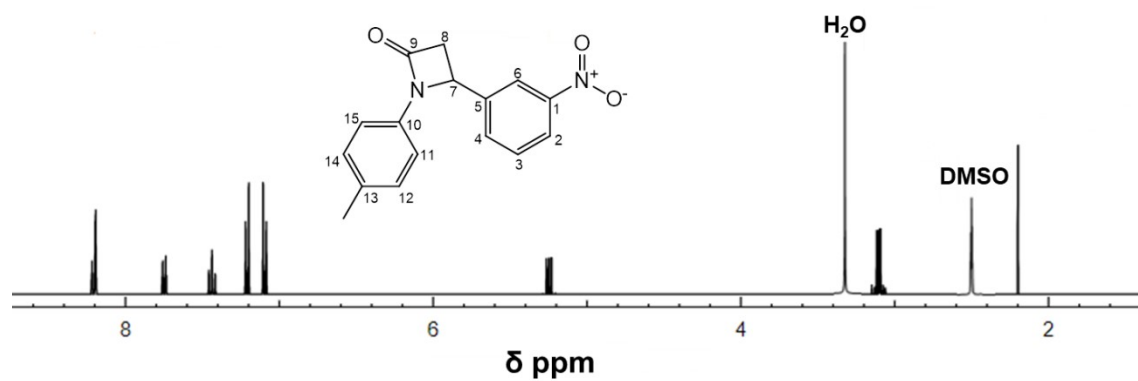

**Figure S1.** <sup>1</sup>H NMR spectrum of compound **B8** recorded in DMSO-*d*<sub>6</sub>.

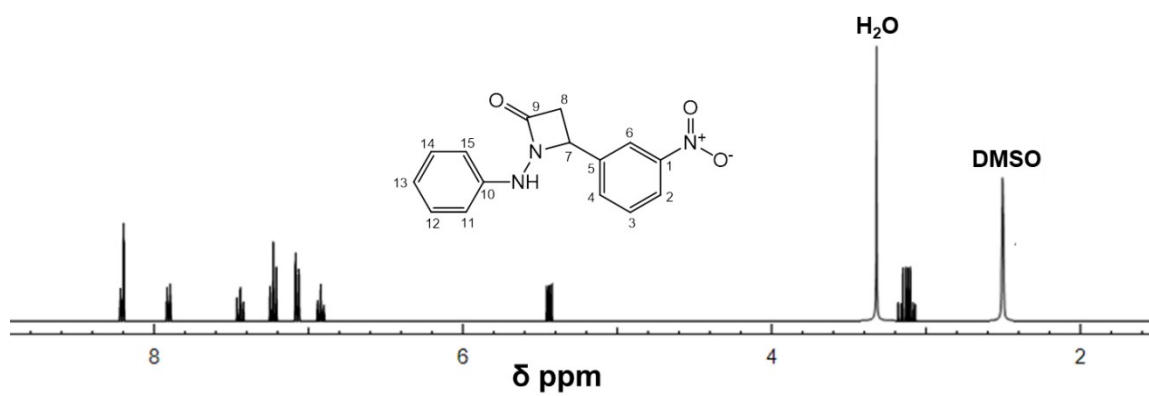

**Figure S2.** <sup>1</sup>H NMR spectrum of compound **B9** recorded in DMSO-*d*<sub>6</sub>.

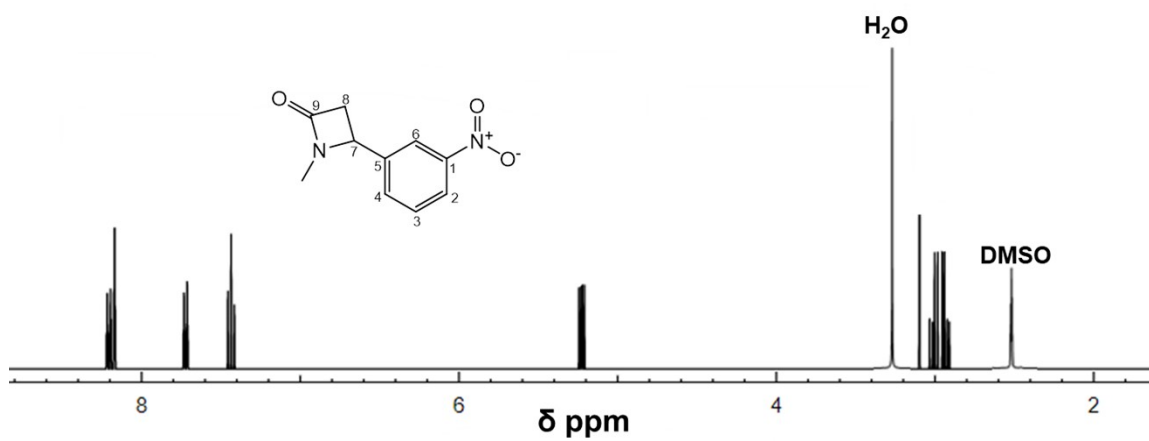

**Figure S3.** <sup>1</sup>H NMR spectrum of compound **B10** recorded in DMSO-*d*<sub>6</sub>.

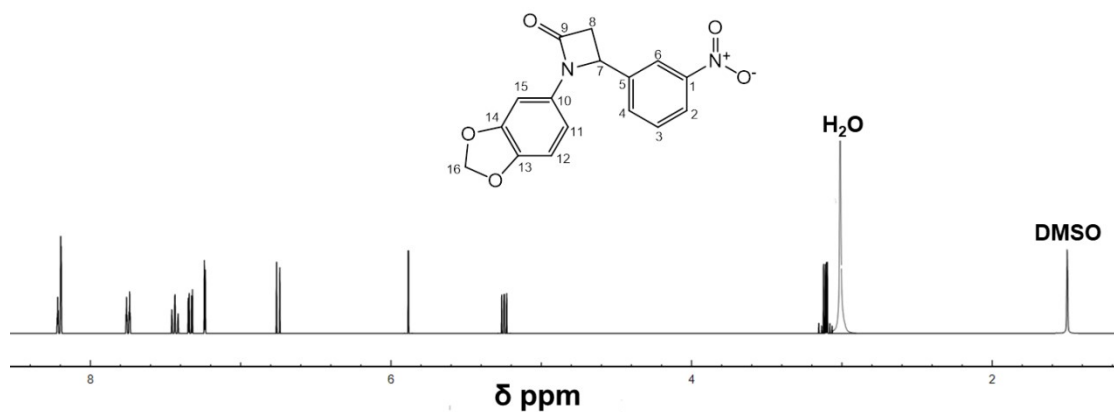

**Figure S4.** <sup>1</sup>H NMR spectrum of compound **B11** recorded in DMSO-*d*<sub>6</sub>.

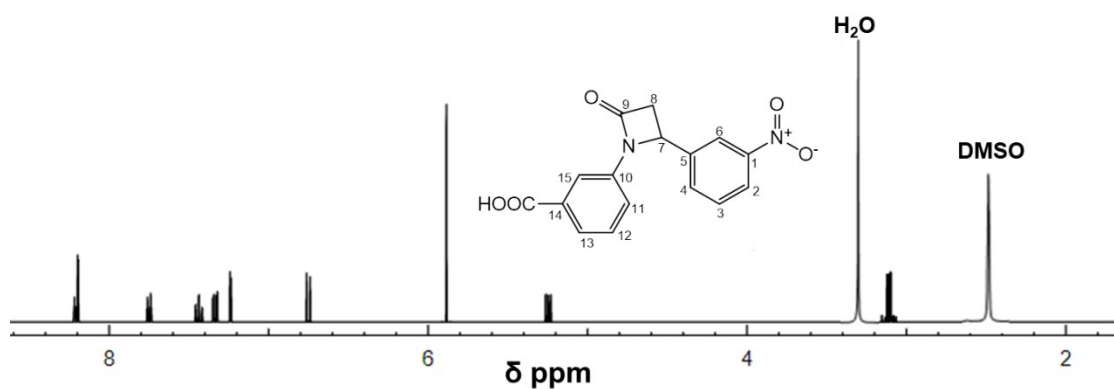

**Figure S5.** <sup>1</sup>H NMR spectrum of compound **B12** recorded in DMSO-*d*<sub>6</sub>.

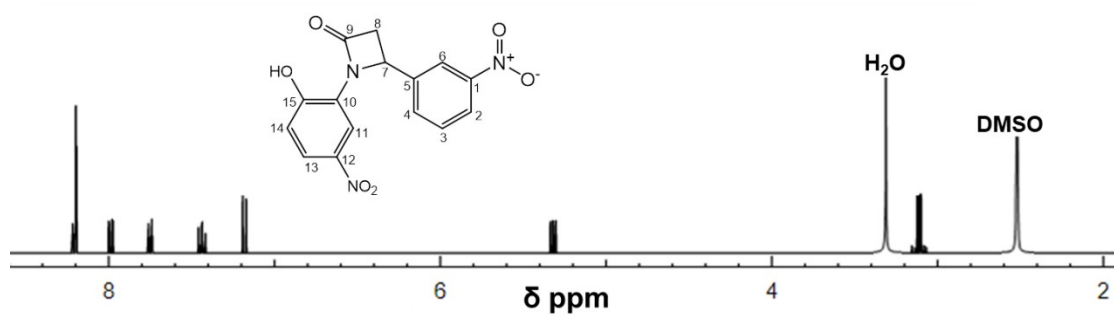

**Figure S6.** <sup>1</sup>H NMR spectrum of compound **B13** recorded in DMSO-*d*<sub>6</sub>.

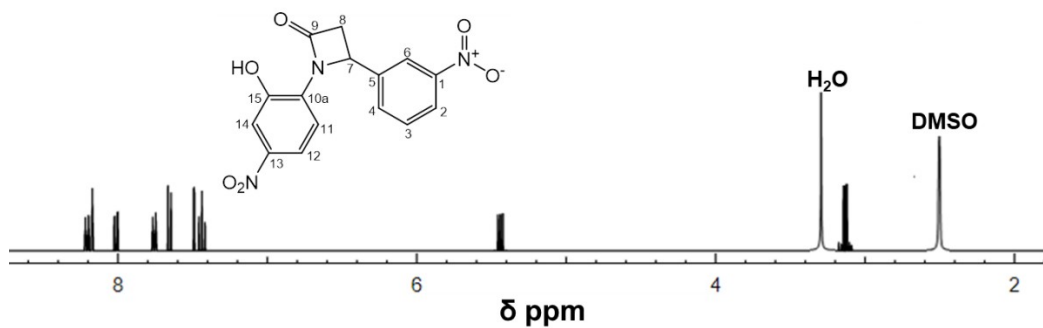

**Figure S7.**  $^1\text{H}$  NMR spectrum of compound **B14** recorded in  $\text{DMSO-}d_6$ .

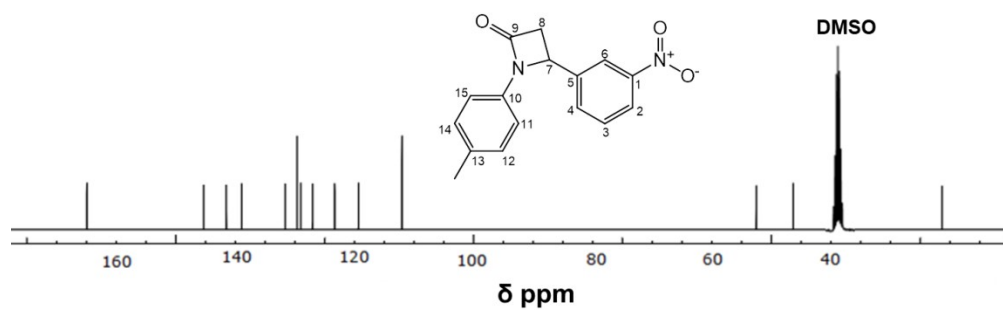

**Figure S8.**  $^{13}\text{C}\{^1\text{H}\}$  NMR spectrum of compound **B8** recorded in  $\text{DMSO-}d_6$ .

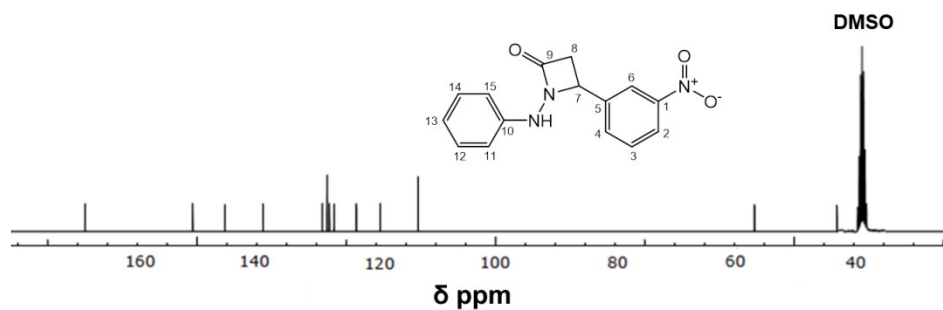

**Figure S9.**  $^{13}\text{C}\{^1\text{H}\}$  NMR spectrum of compound **B9** recorded in  $\text{DMSO-}d_6$ .

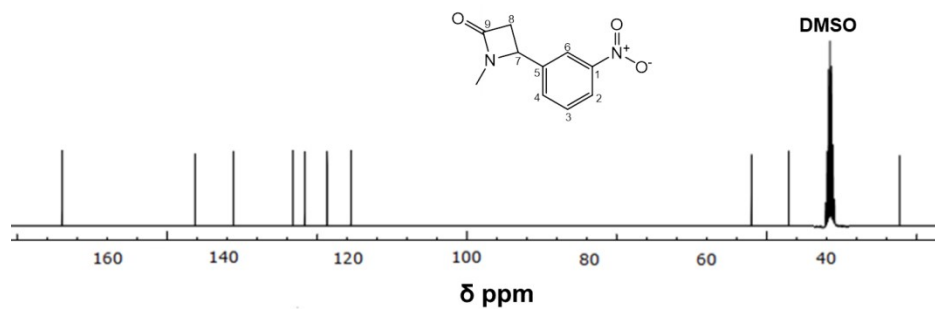

**Figure S10.**  $^{13}\text{C}\{^1\text{H}\}$  NMR spectrum of compound **B10** recorded in  $\text{DMSO-}d_6$ .

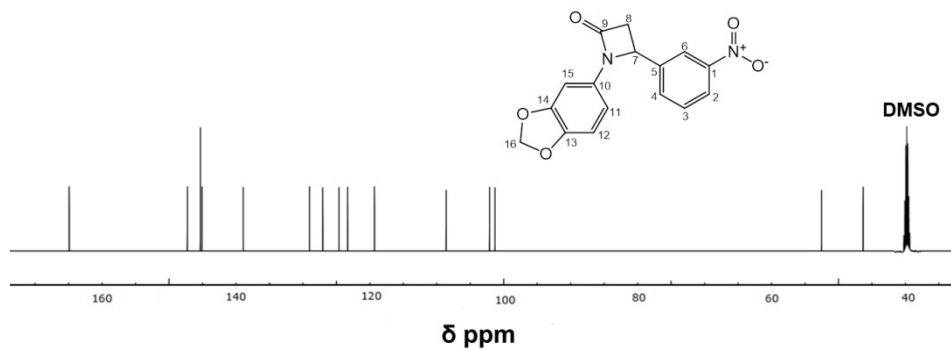

**Figure S11.**  $^{13}\text{C}\{^1\text{H}\}$  NMR spectrum of compound **B11** recorded in  $\text{DMSO-}d_6$ .

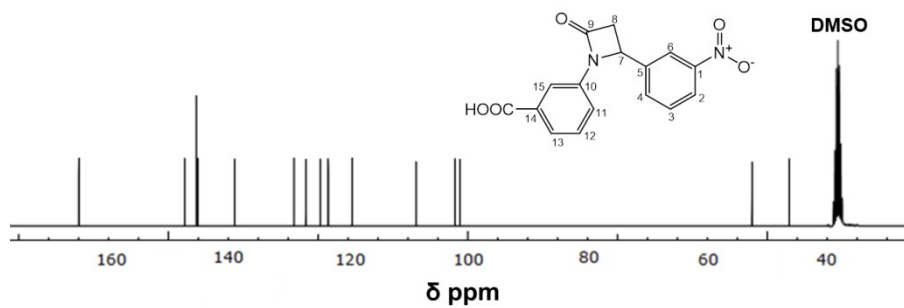

**Figure S12.**  $^{13}\text{C}\{^1\text{H}\}$  NMR spectrum of compound **B12** recorded in  $\text{DMSO-}d_6$ .

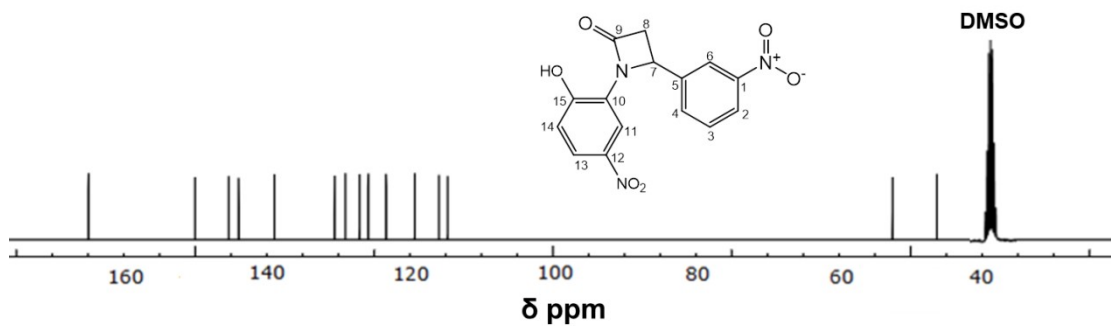

**Figure S13.**  $^{13}\text{C}\{^1\text{H}\}$  NMR spectrum of compound **B13** recorded in  $\text{DMSO-}d_6$ .

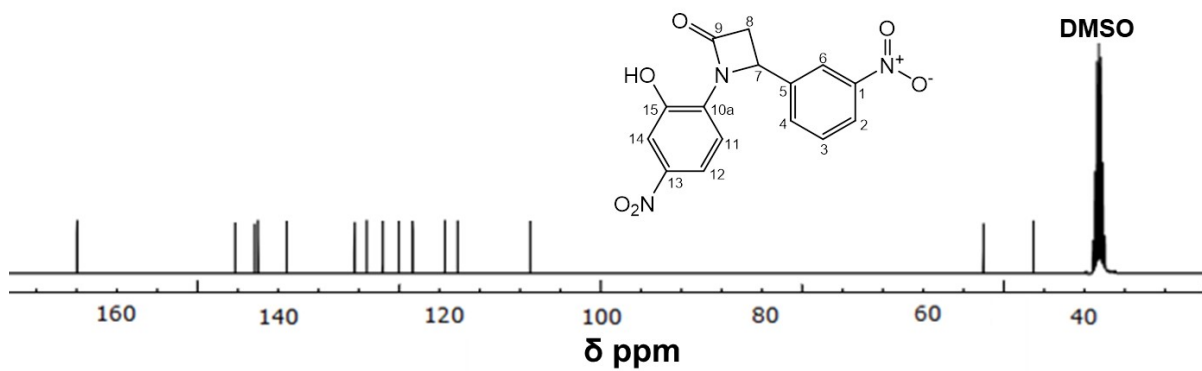

**Figure S14.**  $^{13}\text{C}\{^1\text{H}\}$  NMR spectrum of compound **B14** recorded in  $\text{DMSO-}d_6$ .

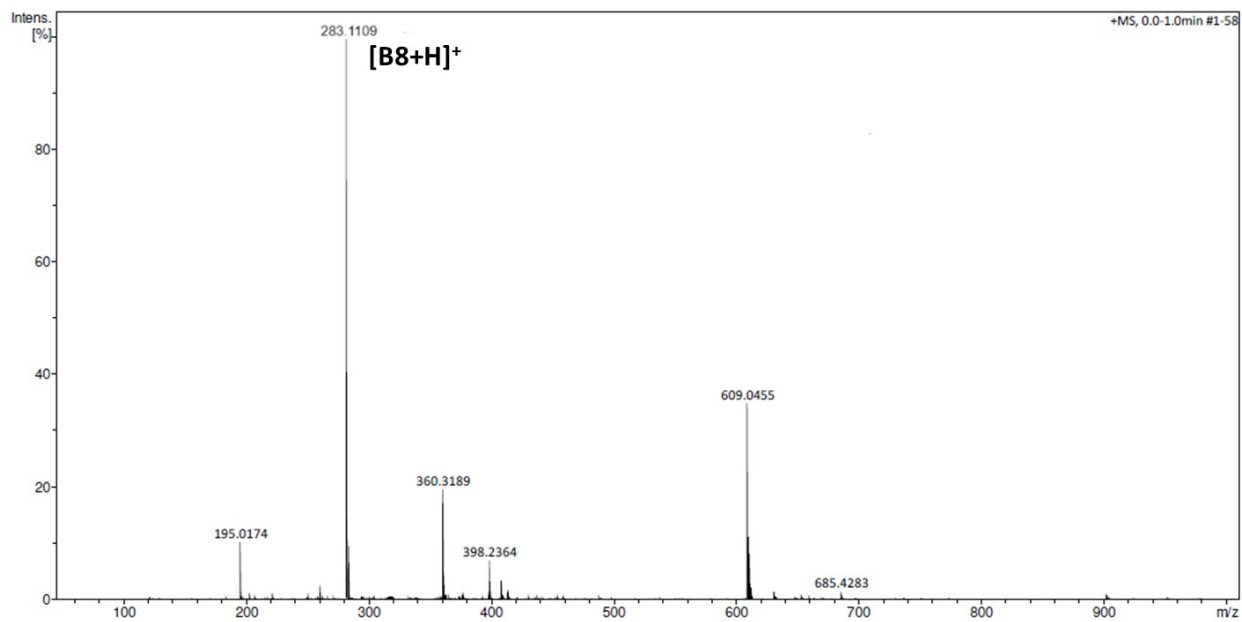

**Figure S15.** ESI-mass spectrum of compound **B8**.

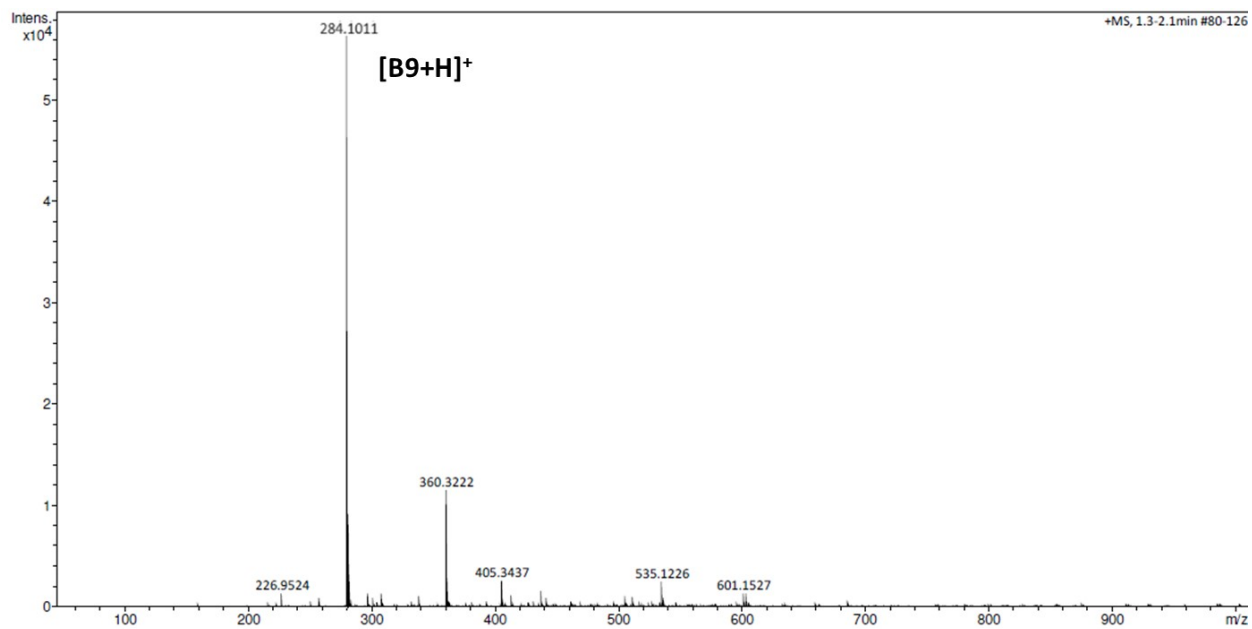

**Figure S16.** ESI-mass spectrum of compound **B9**.

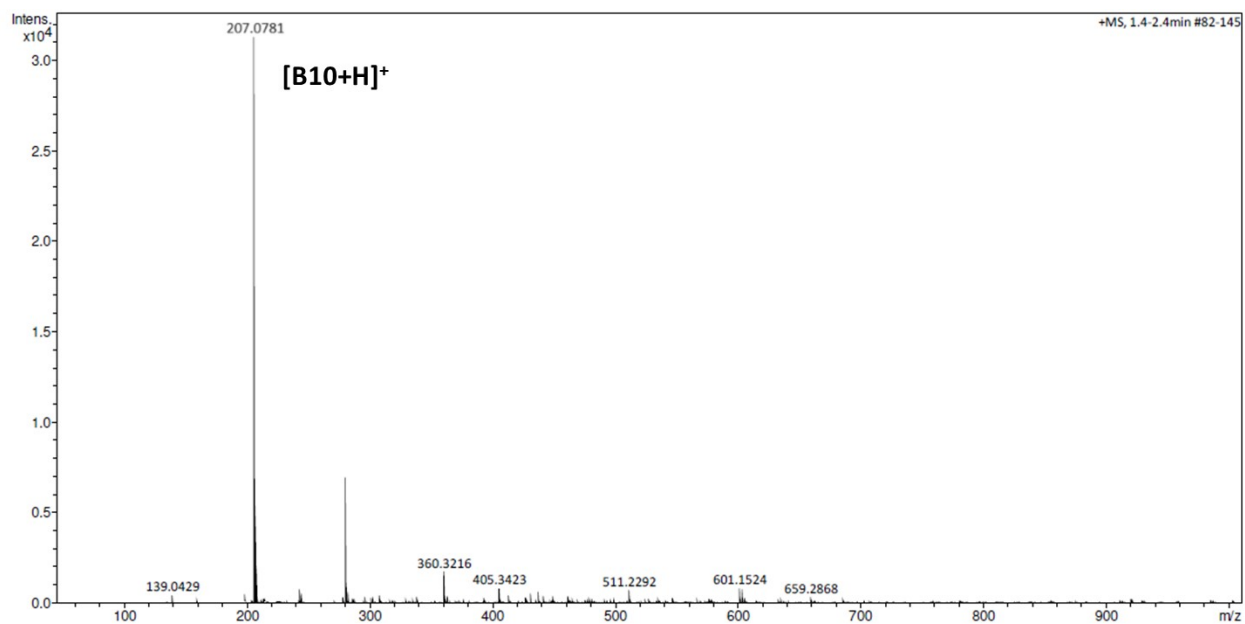

Figure S17. ESI-mass spectrum of compound B10.

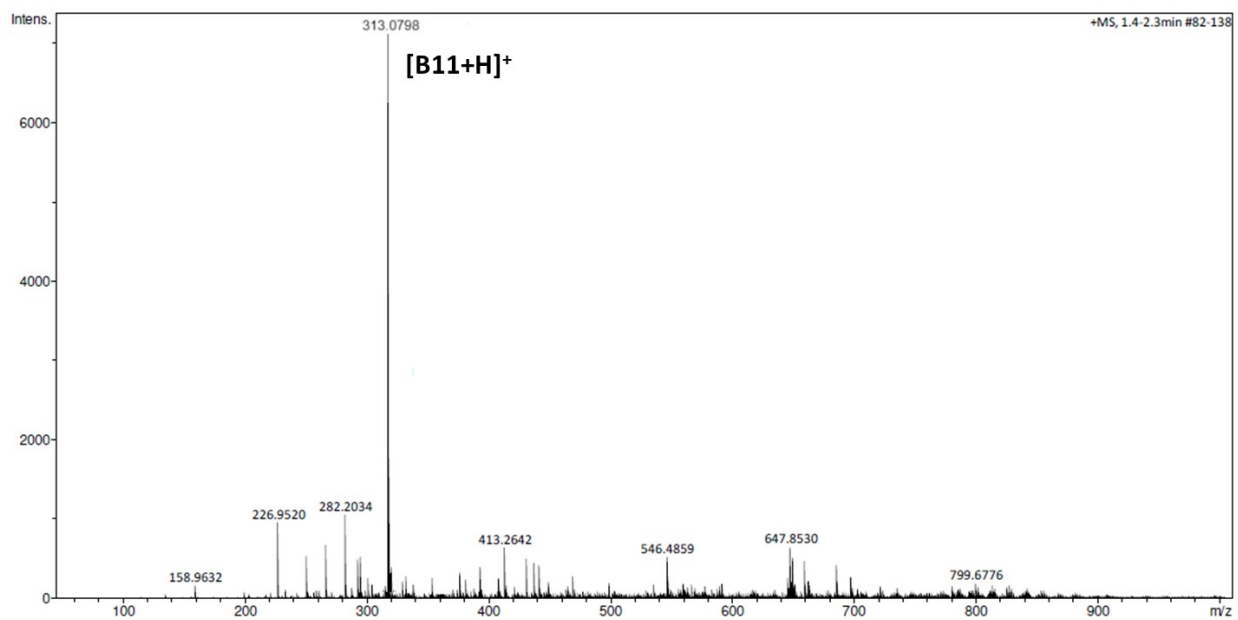

Figure S18. ESI-mass spectrum of compound B11.



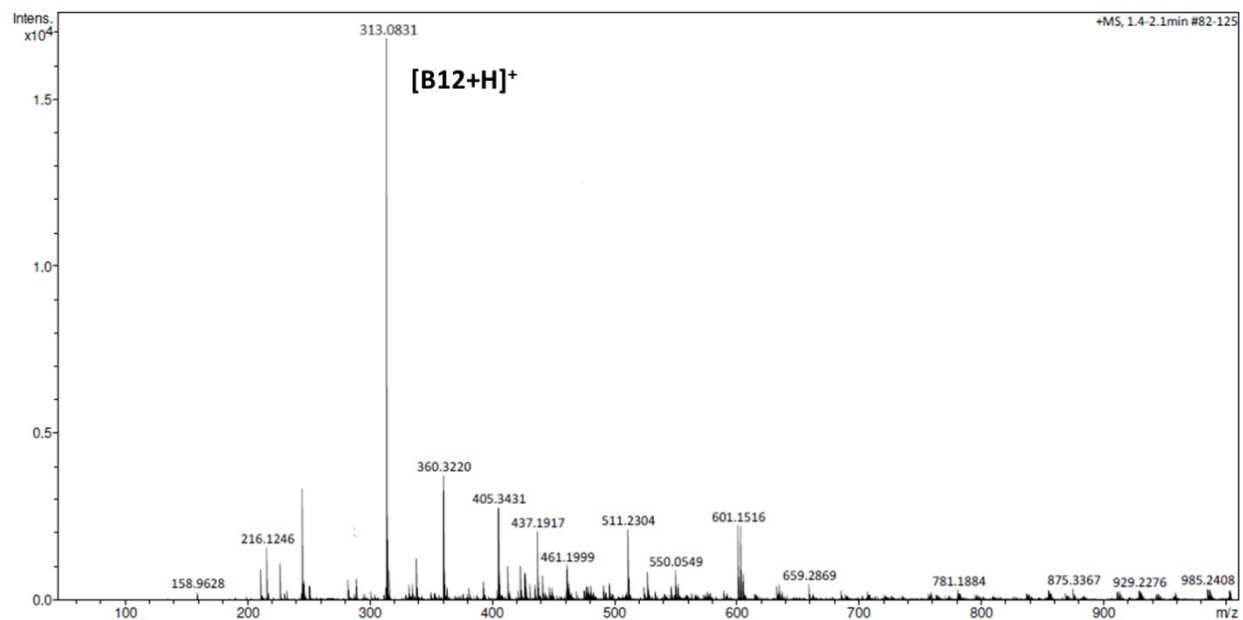

Figure S19. ESI-mass spectrum of compound B12.

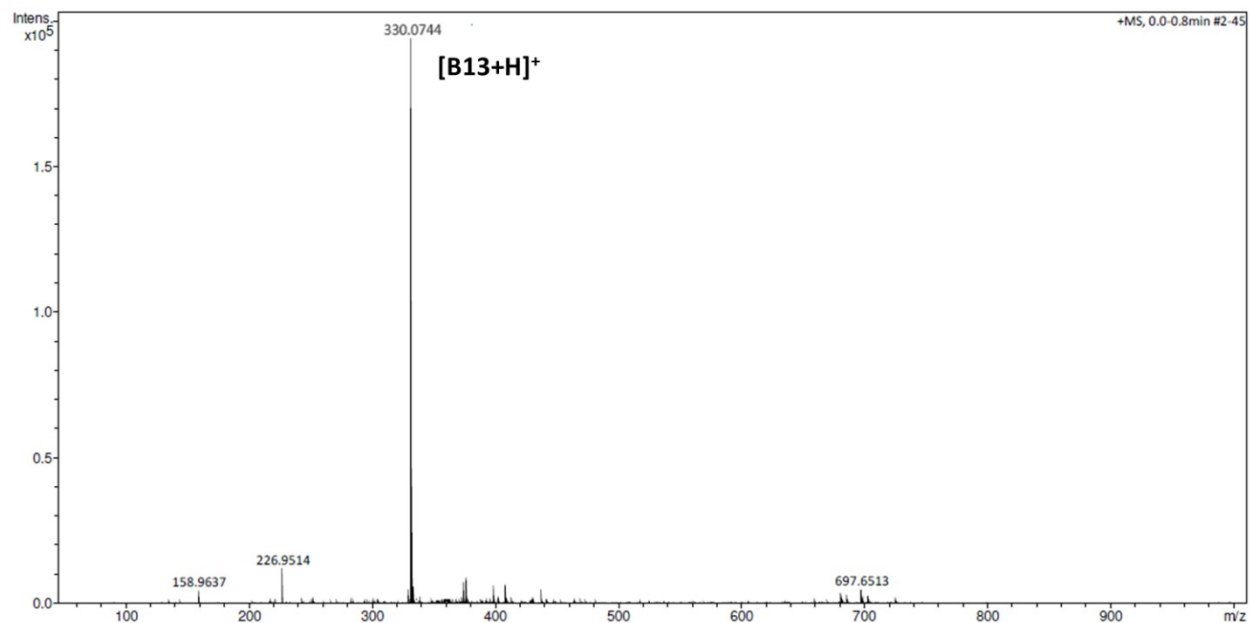

Figure S20. ESI-mass spectrum of compound B13.

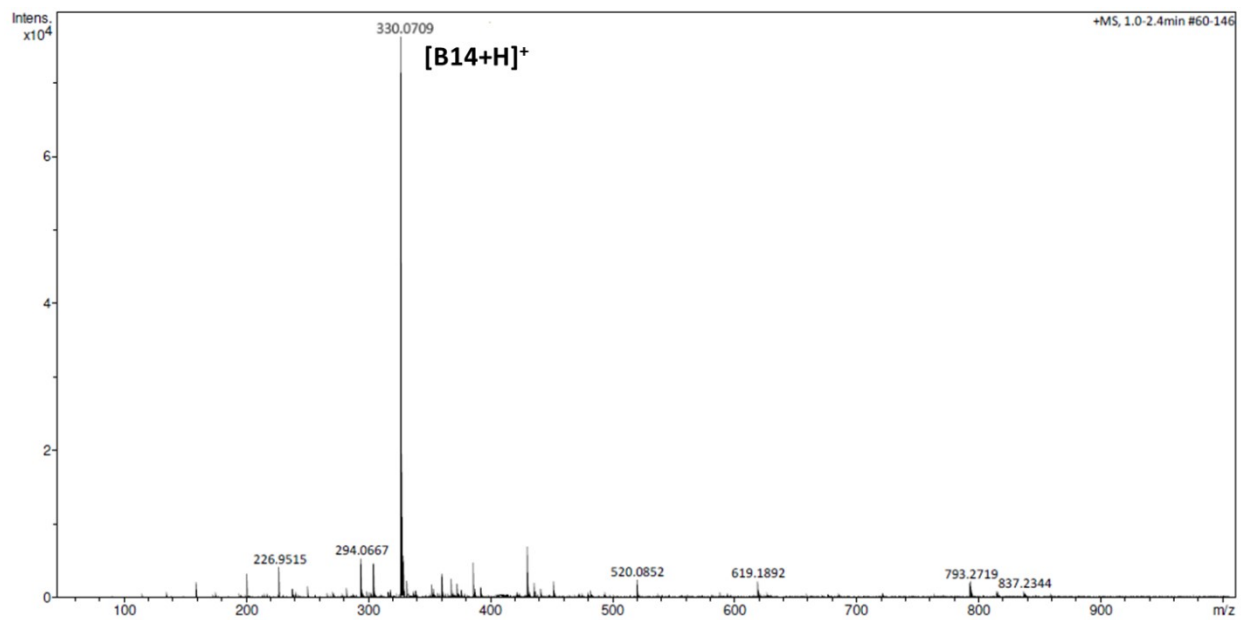

**Figure S21.** ESI-mass spectrum of compound **B14**.

**Table S1:** Effect of B8 on blood glucose level (mg/dL) in diabetic rabbits group–A

| Exp. Rabbits   | Fasting 24 h | *Induced 72 h | Dose of B8 (mg) | Decrease in blood glucose level |     |     |     | Average Decrease | **% Sig. |
|----------------|--------------|---------------|-----------------|---------------------------------|-----|-----|-----|------------------|----------|
|                |              |               |                 | 3h                              | 6h  | 12h | 24h |                  |          |
| R <sub>1</sub> | 136          | 241           | 5               | 230                             | 202 | 200 | 167 | 199.75           | 17.11    |
| R <sub>2</sub> | 130          | 243           |                 | 223                             | 200 | 195 | 177 | 198.75           | 18.20    |
| R <sub>3</sub> | 136          | 245           |                 | 216                             | 197 | 190 | 157 | 190.00           | 22.44    |
| R <sub>4</sub> | 138          | 243           |                 | 228                             | 191 | 185 | 182 | 196.50           | 19.13    |
| R <sub>5</sub> | 130          | 240           |                 | 218                             | 195 | 180 | 152 | 186.25           | 22.39    |
| Average        | 134          | 242           |                 | 223                             | 197 | 190 | 167 | 194.25           | 19.73    |
| R <sub>1</sub> | 136          | 246           | 10              | 215                             | 191 | 184 | 170 | 190.00           | 22.76    |
| R <sub>2</sub> | 130          | 242           |                 | 205                             | 180 | 186 | 160 | 182.75           | 24.48    |
| R <sub>3</sub> | 136          | 260           |                 | 220                             | 183 | 190 | 150 | 185.75           | 28.55    |
| R <sub>4</sub> | 138          | 246           |                 | 200                             | 175 | 187 | 165 | 181.75           | 26.11    |
| R <sub>5</sub> | 130          | 251           |                 | 210                             | 186 | 188 | 155 | 184.75           | 26.39    |
| Average        | 134          | 249           |                 | 210                             | 183 | 190 | 160 | 185.75           | 25.40    |
| R <sub>1</sub> | 136          | 253           | 15              | 244                             | 220 | 182 | 158 | 201.00           | 20.55    |
| R <sub>2</sub> | 130          | 254           |                 | 238                             | 225 | 149 | 148 | 190.00           | 25.19    |
| R <sub>3</sub> | 136          | 253           |                 | 234                             | 200 | 170 | 173 | 194.25           | 23.22    |
| R <sub>4</sub> | 138          | 252           |                 | 230                             | 220 | 149 | 148 | 186.75           | 25.89    |
| R <sub>5</sub> | 130          | 263           |                 | 224                             | 208 | 160 | 143 | 183.75           | 30.13    |
| Average        | 134          | 255           |                 | 234                             | 215 | 162 | 158 | 192.25           | 24.60    |
| R <sub>1</sub> | 136          | 243           | 20              | 232                             | 195 | 180 | 154 | 190.25           | 21.70    |
| R <sub>2</sub> | 130          | 244           |                 | 216                             | 203 | 220 | 150 | 197.25           | 19.15    |
| R <sub>3</sub> | 136          | 243           |                 | 222                             | 197 | 215 | 159 | 198.25           | 18.41    |
| R <sub>4</sub> | 138          | 250           |                 | 226                             | 204 | 185 | 150 | 191.25           | 23.50    |
| R <sub>5</sub> | 130          | 240           |                 | 220                             | 203 | 200 | 172 | 198.75           | 17.18    |
| Average        | 134          | 244           |                 | 222                             | 199 | 180 | 157 | 189.50           | 22.33    |
| R <sub>1</sub> | 136          | 202           | 25              | 160                             | 156 | 134 | 130 | 145.00           | 28.21    |
| R <sub>2</sub> | 130          | 194           |                 | 172                             | 126 | 154 | 115 | 141.75           | 26.93    |
| R <sub>3</sub> | 136          | 200           |                 | 120                             | 161 | 114 | 145 | 135.00           | 32.50    |
| R <sub>4</sub> | 138          | 196           |                 | 160                             | 121 | 119 | 120 | 130.00           | 33.67    |
| R <sub>5</sub> | 130          | 198           |                 | 168                             | 141 | 149 | 140 | 149.50           | 24.49    |
| Average        | 134          | 198           |                 | 166                             | 141 | 134 | 130 | 142.75           | 27.90    |

\*Induced= Dithizone (3 mg) as diabetes inducer, \*\*% significance. = Average decrease/induced blood glucose.

**Table S2:** Average effect of B8 on blood glucose level (mg/dL) in diabetic rabbits group–A

| Fasting 24 h | *Induced 72 h | Conc. B8 (mg) | Decrease in blood glucose level |     |     |     | Average Decrease | **%Sig. |
|--------------|---------------|---------------|---------------------------------|-----|-----|-----|------------------|---------|
|              |               |               | 3h                              | 6h  | 12h | 24h |                  |         |
| 134          | 242           | 5             | 223                             | 197 | 190 | 167 | 194.25           | 19.73   |
| 134          | 249           | 10            | 210                             | 183 | 190 | 160 | 185.75           | 25.40   |
| 134          | 255           | 15            | 234                             | 215 | 162 | 158 | 192.25           | 24.60   |
| 134          | 244           | 20            | 222                             | 199 | 180 | 157 | 189.50           | 22.33   |
| 134          | 198           | 25            | 166                             | 141 | 134 | 130 | 142.75           | 27.90   |
| 131          | 198           | ***Std        | 180                             | 177 | 173 | 169 | 174.75           | 11.74   |

\*Dithizone (3 mg) as diabetes inducer, \*\*% significance. = Average decrease/induced blood glucose, \*\*\*Std= Glibenclamide

**Table S3:** Effect of B9 on blood glucose level (mg/dL) in diabetic rabbits group-B

| Exp. Rabbits   | Fasting 24 h | *Induced 72 h | Dose of B9 (mg) | Decrease in blood glucose level |     |     |     | Average Decrease | **% Sig. |
|----------------|--------------|---------------|-----------------|---------------------------------|-----|-----|-----|------------------|----------|
|                |              |               |                 | 3h                              | 6h  | 12h | 24h |                  |          |
| R <sub>1</sub> | 151          | 200           | 5               | 190                             | 168 | 160 | 155 | 168.25           | 15.87    |
| R <sub>2</sub> | 141          | 220           |                 | 170                             | 180 | 165 | 160 | 168.75           | 23.29    |
| R <sub>3</sub> | 161          | 225           |                 | 190                             | 156 | 150 | 150 | 161.50           | 28.22    |
| R <sub>4</sub> | 136          | 205           |                 | 170                             | 175 | 170 | 160 | 168.75           | 17.68    |
| R <sub>5</sub> | 166          | 200           |                 | 180                             | 158 | 155 | 150 | 160.75           | 19.62    |
| Average        | 151          | 210           |                 | 180                             | 168 | 160 | 155 | 165.75           | 21.07    |
| R <sub>1</sub> | 151          | 190           | 10              | 172                             | 168 | 158 | 143 | 160.25           | 15.65    |
| R <sub>2</sub> | 141          | 200           |                 | 178                             | 171 | 167 | 144 | 165.00           | 17.50    |
| R <sub>3</sub> | 161          | 210           |                 | 166                             | 165 | 155 | 142 | 157.00           | 25.23    |
| R <sub>4</sub> | 136          | 205           |                 | 180                             | 176 | 150 | 146 | 163.00           | 20.48    |
| R <sub>5</sub> | 166          | 195           |                 | 164                             | 160 | 160 | 140 | 156.00           | 20.00    |
| Average        | 151          | 200           |                 | 172                             | 168 | 154 | 143 | 159.25           | 20.37    |
| R <sub>1</sub> | 151          | 200           | 15              | 180                             | 170 | 150 | 140 | 160.00           | 20.00    |
| R <sub>2</sub> | 141          | 215           |                 | 165                             | 175 | 140 | 135 | 153.75           | 28.48    |
| R <sub>3</sub> | 161          | 205           |                 | 180                             | 165 | 160 | 150 | 163.75           | 20.12    |
| R <sub>4</sub> | 136          | 210           |                 | 162                             | 180 | 145 | 140 | 156.75           | 25.35    |
| R <sub>5</sub> | 166          | 200           |                 | 170                             | 160 | 155 | 135 | 155.00           | 22.50    |
| Average        | 151          | 206           |                 | 170                             | 160 | 150 | 140 | 155.00           | 24.75    |
| R <sub>1</sub> | 151          | 198           | 20              | 170                             | 159 | 149 | 130 | 152.00           | 23.23    |
| R <sub>2</sub> | 141          | 182           |                 | 159                             | 160 | 154 | 135 | 152.00           | 16.48    |
| R <sub>3</sub> | 161          | 200           |                 | 185                             | 158 | 144 | 140 | 156.75           | 21.62    |
| R <sub>4</sub> | 136          | 181           |                 | 164                             | 158 | 153 | 137 | 153.00           | 15.46    |
| R <sub>5</sub> | 166          | 201           |                 | 180                             | 160 | 145 | 133 | 154.50           | 23.13    |
| Average        | 151          | 192           |                 | 172                             | 159 | 149 | 135 | 153.75           | 19.92    |
| R <sub>1</sub> | 151          | 198           | 25              | 171                             | 170 | 150 | 144 | 158.75           | 19.82    |
| R <sub>2</sub> | 141          | 194           |                 | 159                             | 162 | 138 | 138 | 149.25           | 23.06    |
| R <sub>3</sub> | 161          | 202           |                 | 180                             | 170 | 155 | 152 | 164.25           | 18.68    |
| R <sub>4</sub> | 136          | 200           |                 | 165                             | 154 | 133 | 131 | 145.75           | 27.12    |
| R <sub>5</sub> | 166          | 196           |                 | 180                             | 162 | 144 | 140 | 156.50           | 20.15    |
| Average        | 151          | 198           |                 | 171                             | 162 | 144 | 141 | 154.50           | 21.96    |

\*Induced= Dithizone (3 mg) as diabetes inducer, \*\*% significance. = Average decrease/induced blood glucose.

**Table S4:** Average effect of B9 on blood glucose level (mg/dL) in diabetic rabbits group-B

| Fasting 24 h | *Induced 72 h | Conc.B8 (mg) | Decrease in blood glucose level |     |     |     | Average Decrease | **%Sig. |
|--------------|---------------|--------------|---------------------------------|-----|-----|-----|------------------|---------|
|              |               |              | 3h                              | 6h  | 12h | 24h |                  |         |
| 151          | 210           | 5            | 180                             | 168 | 160 | 155 | 165.75           | 21.07   |
| 151          | 200           | 10           | 172                             | 168 | 154 | 143 | 159.25           | 20.37   |
| 151          | 206           | 15           | 170                             | 160 | 150 | 140 | 155.00           | 24.75   |
| 151          | 192           | 20           | 172                             | 159 | 149 | 135 | 153.75           | 19.92   |
| 151          | 198           | 25           | 171                             | 162 | 144 | 141 | 154.50           | 21.96   |
| 131          | 198           | ***Std       | 180                             | 177 | 173 | 169 | 174.75           | 11.74   |

\*Dithizone (3 mg) as diabetes inducer, \*\*% significance. = Average decrease/induced blood glucose, \*\*\*Std= Glibenclamide

**Table S5:** Effect of B10 on blood glucose level (mg/dL) in diabetic rabbits group–C

| Exp. Rabbits   | Fasting 24 h | *Induced 72 h | Dose of B10 (mg) | Decrease in blood glucose level |     |     |     | Average Decrease | **% Sig. |
|----------------|--------------|---------------|------------------|---------------------------------|-----|-----|-----|------------------|----------|
|                |              |               |                  | 3h                              | 6h  | 12h | 24h |                  |          |
| R <sub>1</sub> | 120          | 194           | 5                | 192                             | 177 | 168 | 167 | 176.00           | 9.28     |
| R <sub>2</sub> | 126          | 206           |                  | 202                             | 187 | 170 | 169 | 182.00           | 11.65    |
| R <sub>3</sub> | 115          | 195           |                  | 192                             | 172 | 168 | 167 | 174.75           | 10.38    |
| R <sub>4</sub> | 131          | 203           |                  | 197                             | 192 | 170 | 170 | 182.25           | 10.22    |
| R <sub>5</sub> | 123          | 202           |                  | 187                             | 182 | 169 | 167 | 176.25           | 12.75    |
| Average        | 123          | 200           |                  | 192                             | 182 | 173 | 168 | 178.75           | 10.63    |
| R <sub>1</sub> | 120          | 180           | 10               | 175                             | 168 | 160 | 130 | 158.25           | 12.08    |
| R <sub>2</sub> | 126          | 190           |                  | 185                             | 178 | 176 | 133 | 168.00           | 11.58    |
| R <sub>3</sub> | 115          | 175           |                  | 169                             | 163 | 161 | 127 | 155.00           | 11.43    |
| R <sub>4</sub> | 131          | 196           |                  | 191                             | 183 | 178 | 134 | 171.50           | 12.50    |
| R <sub>5</sub> | 123          | 184           |                  | 180                             | 173 | 168 | 126 | 161.75           | 12.29    |
| Average        | 123          | 185           |                  | 180                             | 173 | 169 | 130 | 163.00           | 11.90    |
| R <sub>1</sub> | 120          | 197           | 15               | 170                             | 174 | 168 | 160 | 168.00           | 14.72    |
| R <sub>2</sub> | 126          | 207           |                  | 180                             | 154 | 150 | 150 | 158.50           | 23.43    |
| R <sub>3</sub> | 115          | 212           |                  | 165                             | 184 | 175 | 175 | 174.75           | 17.57    |
| R <sub>4</sub> | 131          | 202           |                  | 185                             | 146 | 142 | 140 | 153.25           | 24.13    |
| R <sub>5</sub> | 123          | 197           |                  | 175                             | 162 | 150 | 150 | 159.25           | 19.16    |
| Average        | 123          | 203           |                  | 175                             | 164 | 157 | 155 | 162.75           | 19.82    |
| R <sub>1</sub> | 120          | 200           | 20               | 163                             | 150 | 147 | 147 | 151.75           | 24.13    |
| R <sub>2</sub> | 126          | 210           |                  | 173                             | 165 | 154 | 154 | 161.50           | 23.10    |
| R <sub>3</sub> | 115          | 195           |                  | 158                             | 155 | 149 | 145 | 151.75           | 22.18    |
| R <sub>4</sub> | 131          | 216           |                  | 178                             | 168 | 153 | 152 | 162.75           | 24.65    |
| R <sub>5</sub> | 123          | 204           |                  | 168                             | 162 | 147 | 147 | 156.00           | 23.53    |
| Average        | 123          | 205           |                  | 168                             | 160 | 150 | 149 | 156.75           | 23.54    |
| R <sub>1</sub> | 120          | 195           | 25               | 167                             | 149 | 140 | 140 | 149.00           | 23.58    |
| R <sub>2</sub> | 126          | 196           |                  | 177                             | 169 | 164 | 142 | 163.00           | 16.83    |
| R <sub>3</sub> | 115          | 201           |                  | 162                             | 144 | 142 | 140 | 147.00           | 26.86    |
| R <sub>4</sub> | 131          | 195           |                  | 182                             | 163 | 143 | 140 | 157.00           | 19.48    |
| R <sub>5</sub> | 123          | 196           |                  | 172                             | 155 | 144 | 138 | 152.25           | 22.32    |
| Average        | 123          | 196           |                  | 172                             | 154 | 143 | 140 | 152.25           | 23.32    |

\*Induced= Dithizone (3 mg) as diabetes inducer, \*\*% significance. = Average decrease/induced blood glucose.

**Table S6:** Average effect of B10 on blood glucose level (mg/dL) in diabetic rabbits group–C

| Fasting 24 h | *Induced 72 h | Conc.B10 (mg) | Decrease in blood glucose level |     |     |     | Average Decrease | **%Sig. |
|--------------|---------------|---------------|---------------------------------|-----|-----|-----|------------------|---------|
|              |               |               | 3h                              | 6h  | 12h | 24h |                  |         |
| 123          | 200           | 5             | 192                             | 182 | 173 | 168 | 178.75           | 10.63   |
| 123          | 185           | 10            | 180                             | 173 | 169 | 130 | 163.00           | 11.90   |
| 123          | 203           | 15            | 175                             | 164 | 157 | 155 | 162.75           | 19.82   |
| 123          | 205           | 20            | 168                             | 160 | 150 | 149 | 156.75           | 23.54   |
| 123          | 196           | 25            | 172                             | 154 | 143 | 140 | 152.25           | 23.32   |
| 131          | 198           | ***Std        | 180                             | 177 | 173 | 169 | 174.75           | 11.74   |

\*Dithizone (3 mg) as diabetes inducer, \*\*% significance. = Average decrease/induced blood glucose, \*\*\*Std= Glibenclamide

**Table S7:** Effect of B11 on blood glucose level (mg/dL) in diabetic rabbits group–D

| Exp. Rabbits   | Fasting 24 h | *Induced 72 h | Dose of B11 (mg) | Decrease in blood glucose level |     |     |     | Average Decrease | **% Sig. |
|----------------|--------------|---------------|------------------|---------------------------------|-----|-----|-----|------------------|----------|
|                |              |               |                  | 3h                              | 6h  | 12h | 24h |                  |          |
| R <sub>1</sub> | 125          | 180           | 5                | 178                             | 175 | 167 | 158 | 169.50           | 5.83     |
| R <sub>2</sub> | 139          | 210           |                  | 198                             | 182 | 174 | 166 | 180.00           | 14.28    |
| R <sub>3</sub> | 121          | 180           |                  | 168                             | 162 | 160 | 159 | 162.25           | 9.86     |
| R <sub>4</sub> | 130          | 185           |                  | 183                             | 167 | 165 | 157 | 168.00           | 9.18     |
| R <sub>5</sub> | 120          | 195           |                  | 193                             | 174 | 169 | 150 | 171.50           | 12.05    |
| Average        | 127          | 190           |                  | 183                             | 172 | 167 | 158 | 170.00           | 10.52    |
| R <sub>1</sub> | 125          | 210           | 10               | 187                             | 176 | 165 | 164 | 173.00           | 17.61    |
| R <sub>2</sub> | 139          | 200           |                  | 172                             | 166 | 160 | 160 | 164.50           | 17.75    |
| R <sub>3</sub> | 121          | 220           |                  | 202                             | 186 | 170 | 165 | 180.75           | 17.84    |
| R <sub>4</sub> | 130          | 215           |                  | 177                             | 161 | 156 | 155 | 162.25           | 24.53    |
| R <sub>5</sub> | 120          | 205           |                  | 197                             | 191 | 174 | 171 | 183.25           | 10.60    |
| Average        | 127          | 210           |                  | 187                             | 176 | 165 | 163 | 172.75           | 17.73    |
| R <sub>1</sub> | 125          | 260           | 15               | 237                             | 218 | 207 | 196 | 214.50           | 17.50    |
| R <sub>2</sub> | 139          | 240           |                  | 222                             | 208 | 197 | 181 | 202.00           | 15.83    |
| R <sub>3</sub> | 121          | 270           |                  | 252                             | 228 | 217 | 211 | 227.00           | 15.92    |
| R <sub>4</sub> | 130          | 235           |                  | 229                             | 203 | 192 | 186 | 202.50           | 13.82    |
| R <sub>5</sub> | 120          | 245           |                  | 245                             | 233 | 222 | 206 | 226.50           | 7.55     |
| Average        | 127          | 250           |                  | 237                             | 218 | 207 | 196 | 214.50           | 14.20    |
| R <sub>1</sub> | 125          | 215           | 20               | 213                             | 172 | 163 | 154 | 175.50           | 18.37    |
| R <sub>2</sub> | 139          | 250           |                  | 223                             | 177 | 164 | 155 | 179.75           | 28.10    |
| R <sub>3</sub> | 121          | 220           |                  | 203                             | 197 | 162 | 153 | 178.75           | 18.75    |
| R <sub>4</sub> | 130          | 240           |                  | 228                             | 202 | 171 | 158 | 189.75           | 20.93    |
| R <sub>5</sub> | 120          | 225           |                  | 198                             | 187 | 155 | 150 | 172.50           | 23.33    |
| Average        | 127          | 230           |                  | 213                             | 187 | 163 | 154 | 179.25           | 22.06    |
| R <sub>1</sub> | 125          | 240           | 25               | 236                             | 196 | 154 | 154 | 185.00           | 22.91    |
| R <sub>2</sub> | 139          | 230           |                  | 210                             | 181 | 163 | 163 | 179.25           | 22.06    |
| R <sub>3</sub> | 121          | 250           |                  | 233                             | 211 | 183 | 169 | 199.00           | 20.40    |
| R <sub>4</sub> | 130          | 245           |                  | 213                             | 186 | 178 | 164 | 185.25           | 24.38    |
| R <sub>5</sub> | 120          | 235           |                  | 223                             | 206 | 168 | 160 | 189.25           | 19.46    |
| Average        | 127          | 240           |                  | 223                             | 196 | 173 | 162 | 188.50           | 21.45    |

\*Induced= Dithizone (3 mg) as diabetes inducer, \*\*% significance. = Average decrease/induced blood glucose.

**Table S8:** Average effect of B11 on blood glucose level (mg/dL) in diabetic rabbits group–D

| Fasting 24 h | *Induced 72 h | Conc.B11 (mg) | Decrease in blood glucose level |     |     |     | Average Decrease | **%Sig. |
|--------------|---------------|---------------|---------------------------------|-----|-----|-----|------------------|---------|
|              |               |               | 3h                              | 6h  | 12h | 24h |                  |         |
| 125          | 190           | 5             | 183                             | 172 | 167 | 158 | 170.00           | 10.52   |
| 125          | 210           | 10            | 187                             | 176 | 165 | 163 | 172.75           | 17.73   |
| 125          | 250           | 15            | 237                             | 218 | 207 | 196 | 214.50           | 14.20   |
| 125          | 230           | 20            | 213                             | 187 | 163 | 154 | 179.25           | 22.06   |
| 125          | 240           | 25            | 223                             | 196 | 173 | 162 | 188.50           | 21.45   |
| 131          | 198           | ***Std        | 180                             | 177 | 173 | 169 | 174.75           | 11.74   |

\*Dithizone (3 mg) as diabetes inducer, \*\*% significance. = Average decrease/induced blood glucose, \*\*\*Std= Glibenclamide

**Table S9:** Effect of B12 on blood glucose level (mg/dL) in diabetic rabbits group–E

| Exp. Rabbits   | Fasting 24 h | *Induced 72 h | Dose of B12 (mg) | Decrease in blood glucose level |     |     |     | Average Decrease | **% Sig. |
|----------------|--------------|---------------|------------------|---------------------------------|-----|-----|-----|------------------|----------|
|                |              |               |                  | 3h                              | 6h  | 12h | 24h |                  |          |
| R <sub>1</sub> | 138          | 192           | 5                | 185                             | 163 | 161 | 161 | 167.50           | 12.76    |
| R <sub>2</sub> | 145          | 197           |                  | 183                             | 168 | 163 | 153 | 166.75           | 15.35    |
| R <sub>3</sub> | 137          | 205           |                  | 187                             | 162 | 156 | 155 | 165.00           | 19.51    |
| R <sub>4</sub> | 145          | 201           |                  | 190                             | 172 | 162 | 158 | 170.50           | 15.17    |
| R <sub>5</sub> | 135          | 195           |                  | 180                             | 170 | 158 | 159 | 166.75           | 14.48    |
| Average        | 140          | 198           |                  | 195                             | 167 | 160 | 157 | 169.75           | 14.26    |
| R <sub>1</sub> | 138          | 206           | 10               | 185                             | 178 | 162 | 126 | 162.75           | 21.00    |
| R <sub>2</sub> | 145          | 196           |                  | 190                             | 168 | 160 | 133 | 162.75           | 16.96    |
| R <sub>3</sub> | 137          | 198           |                  | 196                             | 160 | 158 | 126 | 160.00           | 19.19    |
| R <sub>4</sub> | 145          | 205           |                  | 188                             | 172 | 166 | 136 | 165.50           | 19.26    |
| R <sub>5</sub> | 135          | 195           |                  | 186                             | 165 | 164 | 129 | 161.00           | 17.43    |
| Average        | 140          | 200           |                  | 190                             | 170 | 162 | 130 | 163.00           | 18.50    |
| R <sub>1</sub> | 138          | 235           | 15               | 228                             | 158 | 148 | 145 | 169.75           | 27.77    |
| R <sub>2</sub> | 145          | 237           |                  | 224                             | 164 | 147 | 141 | 169.00           | 28.69    |
| R <sub>3</sub> | 137          | 233           |                  | 230                             | 157 | 146 | 137 | 167.50           | 28.11    |
| R <sub>4</sub> | 145          | 230           |                  | 218                             | 165 | 155 | 137 | 168.75           | 26.63    |
| R <sub>5</sub> | 135          | 240           |                  | 220                             | 160 | 154 | 142 | 169.00           | 29.58    |
| Average        | 140          | 235           |                  | 224                             | 161 | 150 | 140 | 168.75           | 28.19    |
| R <sub>1</sub> | 138          | 244           | 20               | 207                             | 171 | 161 | 136 | 168.75           | 30.84    |
| R <sub>2</sub> | 145          | 246           |                  | 197                             | 171 | 165 | 138 | 167.75           | 31.80    |
| R <sub>3</sub> | 137          | 242           |                  | 196                             | 168 | 150 | 144 | 164.50           | 32.02    |
| R <sub>4</sub> | 145          | 248           |                  | 205                             | 165 | 166 | 140 | 169.00           | 31.85    |
| R <sub>5</sub> | 135          | 240           |                  | 195                             | 175 | 163 | 142 | 168.75           | 29.69    |
| Average        | 140          | 244           |                  | 200                             | 170 | 165 | 140 | 168.75           | 30.84    |
| R <sub>1</sub> | 138          | 252           | 25               | 195                             | 166 | 152 | 140 | 163.25           | 35.21    |
| R <sub>2</sub> | 145          | 263           |                  | 207                             | 167 | 158 | 144 | 169.00           | 35.74    |
| R <sub>3</sub> | 137          | 258           |                  | 198                             | 174 | 150 | 138 | 165.00           | 36.04    |
| R <sub>4</sub> | 145          | 252           |                  | 206                             | 175 | 152 | 142 | 168.75           | 33.03    |
| R <sub>5</sub> | 135          | 250           |                  | 194                             | 172 | 158 | 136 | 165.00           | 34.00    |
| Average        | 140          | 255           |                  | 200                             | 170 | 154 | 140 | 166.00           | 34.90    |

\*Induced= Dithizone (3 mg) as diabetes inducer, \*\*% significance. = Average decrease/induced blood glucose.

**Table S10:** Average effect of B12 on blood glucose level (mg/dL) in diabetic rabbits group–E

| Fasting 24 h | *Induced 72 h | Conc. B12 (mg) | Decrease in blood glucose level |     |     |     | Average Decrease | **%Sig. |
|--------------|---------------|----------------|---------------------------------|-----|-----|-----|------------------|---------|
|              |               |                | 3h                              | 6h  | 12h | 24h |                  |         |
| 140          | 198           | 5              | 195                             | 167 | 160 | 157 | 169.75           | 14.26   |
| 140          | 200           | 10             | 190                             | 170 | 162 | 130 | 163.00           | 18.50   |
| 140          | 235           | 15             | 224                             | 161 | 150 | 140 | 168.75           | 28.19   |
| 140          | 244           | 20             | 200                             | 170 | 165 | 140 | 168.75           | 30.84   |
| 140          | 255           | 25             | 200                             | 170 | 154 | 140 | 166.00           | 34.90   |
| 131          | 198           | ***Std         | 180                             | 177 | 173 | 169 | 174.75           | 11.74   |

\*Dithizone (3 mg) as diabetes inducer, \*\*\*% significance. = Average decrease/induced blood glucose, \*\*\*Std= Glibenclamide

**Table S11: Effect of B13 on blood glucose level (mg/dL) in diabetic rabbits group–F**

| Exp. Rabbits   | Fasting 24 h | *Induced 72 h | Dose of B13 (mg) | Decrease in blood glucose level |     |     |     | Average Decrease | ***% Sig. |
|----------------|--------------|---------------|------------------|---------------------------------|-----|-----|-----|------------------|-----------|
|                |              |               |                  | 3h                              | 6h  | 12h | 24h |                  |           |
| R <sub>1</sub> | 130          | 220           | 5                | 213                             | 203 | 195 | 164 | 193.75           | 11.93     |
| R <sub>2</sub> | 127          | 219           |                  | 212                             | 202 | 186 | 166 | 191.50           | 12.55     |
| R <sub>3</sub> | 133          | 222           |                  | 211                             | 200 | 202 | 167 | 195.00           | 12.16     |
| R <sub>4</sub> | 131          | 224           |                  | 210                             | 201 | 201 | 168 | 195.00           | 12.94     |
| R <sub>5</sub> | 134          | 215           |                  | 204                             | 194 | 201 | 160 | 189.75           | 11.74     |
| Average        | 131          | 220           |                  | 207                             | 200 | 197 | 165 | 192.25           | 12.61     |
| R <sub>1</sub> | 130          | 196           | 10               | 180                             | 170 | 163 | 167 | 170.00           | 13.26     |
| R <sub>2</sub> | 127          | 194           |                  | 182                             | 172 | 162 | 165 | 170.25           | 12.24     |
| R <sub>3</sub> | 133          | 198           |                  | 193                             | 173 | 173 | 170 | 177.25           | 10.47     |
| R <sub>4</sub> | 131          | 195           |                  | 179                             | 170 | 170 | 164 | 170.75           | 12.43     |
| R <sub>5</sub> | 134          | 192           |                  | 186                             | 165 | 165 | 172 | 172.00           | 10.41     |
| Average        | 131          | 195           |                  | 180                             | 170 | 164 | 166 | 170.00           | 12.82     |
| R <sub>1</sub> | 130          | 220           | 15               | 170                             | 167 | 160 | 150 | 161.75           | 26.47     |
| R <sub>2</sub> | 127          | 223           |                  | 172                             | 173 | 162 | 149 | 164.00           | 26.45     |
| R <sub>3</sub> | 133          | 222           |                  | 173                             | 164 | 163 | 151 | 162.75           | 26.68     |
| R <sub>4</sub> | 131          | 224           |                  | 170                             | 161 | 166 | 153 | 162.50           | 27.45     |
| R <sub>5</sub> | 134          | 221           |                  | 165                             | 160 | 159 | 152 | 159.00           | 28.05     |
| Average        | 131          | 222           |                  | 170                             | 165 | 162 | 151 | 162.00           | 27.02     |
| R <sub>1</sub> | 130          | 205           | 20               | 163                             | 160 | 160 | 142 | 156.25           | 23.78     |
| R <sub>2</sub> | 127          | 204           |                  | 162                             | 163 | 163 | 143 | 157.75           | 22.67     |
| R <sub>3</sub> | 133          | 213           |                  | 171                             | 164 | 163 | 144 | 160.50           | 24.64     |
| R <sub>4</sub> | 131          | 202           |                  | 163                             | 156 | 156 | 146 | 155.25           | 23.14     |
| R <sub>5</sub> | 134          | 201           |                  | 161                             | 157 | 154 | 145 | 154.25           | 23.25     |
| Average        | 131          | 205           |                  | 164                             | 160 | 159 | 144 | 156.75           | 23.53     |
| R <sub>1</sub> | 130          | 200           | 25               | 167                             | 152 | 139 | 130 | 147.00           | 26.50     |
| R <sub>2</sub> | 127          | 201           |                  | 165                             | 143 | 136 | 131 | 143.75           | 28.48     |
| R <sub>3</sub> | 133          | 202           |                  | 170                             | 149 | 133 | 132 | 146.00           | 27.72     |
| R <sub>4</sub> | 131          | 200           |                  | 164                             | 150 | 134 | 129 | 144.25           | 27.87     |
| R <sub>5</sub> | 134          | 202           |                  | 172                             | 151 | 143 | 133 | 149.75           | 25.86     |
| Average        | 131          | 201           |                  | 167                             | 149 | 137 | 131 | 146.00           | 27.36     |

\*Induced= Dithizone (3 mg) as diabetes inducer, \*\*\*% significance. = Average decrease/induced blood glucose.

**Table S12: Average effect of B13 on blood glucose level (mg/dL) in diabetic rabbits group–F**

| Fasting 24 h | *Induced 72 h | Conc.B-13 (mg) | Decrease in blood glucose level |     |     |     | Average Decrease | ***% Sig. |
|--------------|---------------|----------------|---------------------------------|-----|-----|-----|------------------|-----------|
|              |               |                | 3h                              | 6h  | 12h | 24h |                  |           |
| 131          | 220           | 5              | 207                             | 200 | 197 | 165 | 192.25           | 12.61     |
| 131          | 195           | 10             | 180                             | 170 | 164 | 166 | 170.00           | 12.82     |
| 131          | 222           | 15             | 170                             | 165 | 162 | 151 | 162.00           | 27.02     |
| 131          | 205           | 20             | 164                             | 160 | 159 | 144 | 156.75           | 23.53     |
| 131          | 201           | 25             | 167                             | 149 | 137 | 131 | 146.00           | 27.36     |
| 131          | 198           | ***Std         | 180                             | 177 | 173 | 169 | 174.75           | 11.74     |

\*Dithizone (3 mg) as diabetes inducer, \*\*\*% significance. = Average decrease/induced blood glucose, \*\*\*Std= Glibenclamide



**Table S13:** Effect of B14 on blood glucose level (mg/dL) in diabetic rabbits group–G

| Exp. Rabbits   | Fasting 24 h | *Induced 72 h | Dose of B14 (mg) | Decrease in blood glucose level |     |     |     | Average Decrease | **% Sig. |
|----------------|--------------|---------------|------------------|---------------------------------|-----|-----|-----|------------------|----------|
|                |              |               |                  | 3h                              | 6h  | 12h | 24h |                  |          |
| R <sub>1</sub> | 117          | 192           | 5                | 172                             | 170 | 152 | 150 | 161.00           | 16.14    |
| R <sub>2</sub> | 127          | 199           |                  | 165                             | 168 | 158 | 155 | 161.50           | 18.84    |
| R <sub>3</sub> | 120          | 189           |                  | 179                             | 173 | 159 | 149 | 165.00           | 12.69    |
| R <sub>4</sub> | 124          | 199           |                  | 164                             | 171 | 150 | 146 | 157.75           | 20.72    |
| R <sub>5</sub> | 122          | 185           |                  | 180                             | 168 | 156 | 150 | 163.50           | 11.62    |
| Average        | 122          | 192           |                  | 172                             | 170 | 155 | 150 | 161.75           | 15.75    |
| R <sub>1</sub> | 117          | 200           | 10               | 171                             | 167 | 161 | 150 | 162.25           | 18.87    |
| R <sub>2</sub> | 127          | 205           |                  | 175                             | 171 | 159 | 153 | 164.50           | 19.75    |
| R <sub>3</sub> | 120          | 195           |                  | 179                             | 175 | 162 | 147 | 165.75           | 15.00    |
| R <sub>4</sub> | 124          | 205           |                  | 178                             | 174 | 165 | 159 | 169.00           | 17.56    |
| R <sub>5</sub> | 122          | 195           |                  | 172                             | 170 | 153 | 144 | 159.75           | 18.07    |
| Average        | 122          | 200           |                  | 175                             | 171 | 160 | 150 | 164.00           | 18.00    |
| R <sub>1</sub> | 117          | 220           | 15               | 190                             | 175 | 145 | 145 | 163.75           | 25.56    |
| R <sub>2</sub> | 127          | 225           |                  | 185                             | 174 | 155 | 147 | 165.25           | 26.55    |
| R <sub>3</sub> | 120          | 215           |                  | 190                             | 178 | 154 | 143 | 166.25           | 22.67    |
| R <sub>4</sub> | 124          | 230           |                  | 180                             | 175 | 147 | 144 | 161.50           | 29.78    |
| R <sub>5</sub> | 122          | 210           |                  | 175                             | 173 | 149 | 146 | 160.75           | 23.45    |
| Average        | 122          | 220           |                  | 185                             | 175 | 150 | 145 | 163.75           | 25.56    |
| R <sub>1</sub> | 117          | 250           | 20               | 172                             | 160 | 152 | 148 | 158.00           | 36.80    |
| R <sub>2</sub> | 127          | 235           |                  | 175                             | 168 | 155 | 145 | 160.75           | 31.59    |
| R <sub>3</sub> | 120          | 230           |                  | 169                             | 165 | 148 | 151 | 158.25           | 31.19    |
| R <sub>4</sub> | 124          | 260           |                  | 180                             | 169 | 154 | 150 | 163.25           | 37.21    |
| R <sub>5</sub> | 122          | 245           |                  | 164                             | 162 | 146 | 146 | 154.50           | 36.93    |
| Average        | 122          | 244           |                  | 172                             | 162 | 150 | 148 | 158.00           | 35.24    |
| R <sub>1</sub> | 117          | 253           | 25               | 180                             | 169 | 145 | 140 | 158.50           | 37.35    |
| R <sub>2</sub> | 127          | 256           |                  | 175                             | 161 | 155 | 137 | 157.00           | 38.67    |
| R <sub>3</sub> | 120          | 263           |                  | 185                             | 170 | 150 | 142 | 161.75           | 38.49    |
| R <sub>4</sub> | 124          | 250           |                  | 165                             | 161 | 135 | 142 | 150.75           | 39.70    |
| R <sub>5</sub> | 122          | 243           |                  | 195                             | 164 | 140 | 139 | 159.50           | 34.36    |
| Average        | 122          | 253           |                  | 180                             | 165 | 145 | 140 | 157.50           | 37.74    |

\*Induced= Dithizone (3 mg) as diabetes inducer, \*\*% significance. = Average decrease/induced blood glucose.

**Table S14:** Average effect of B14 on blood glucose level (mg/dL) in diabetic rabbits group–G

| Fasting 24 h | *Induced 72 h | Conc.B14 (mg) | Decrease in blood glucose level |     |     |     | Average Decrease | **%Sig. |
|--------------|---------------|---------------|---------------------------------|-----|-----|-----|------------------|---------|
|              |               |               | 3h                              | 6h  | 12h | 24h |                  |         |
| 122          | 192           | 5             | 172                             | 170 | 155 | 150 | 161.75           | 15.75   |
| 122          | 200           | 10            | 175                             | 171 | 160 | 150 | 164.00           | 18.00   |
| 122          | 220           | 15            | 185                             | 175 | 150 | 145 | 163.75           | 25.56   |
| 122          | 244           | 20            | 172                             | 162 | 150 | 148 | 158.00           | 35.24   |
| 122          | 253           | 25            | 180                             | 165 | 145 | 140 | 157.50           | 37.74   |
| 131          | 198           | ***Std        | 180                             | 177 | 173 | 169 | 174.75           | 11.74   |

\*Dithizone (3 mg) as diabetes inducer, \*\*% significance. = Average decrease/induced blood glucose, \*\*\*Std= Glibenclamide

**Table S15:** Effects of  $\beta$ -lactams (**B8-B14**) on alanine aminotransferase levels (ALT) in rabbits with dithizone-induced diabetes at a dosage of 5 mg/kg.

| $\beta$ -lactams<br>(Study Groups) | Normal ALT Level (U/U)<br>Pre-induced Diabetes | ALT Level (U/U) 72 h<br>Post-induced Diabetes | Time after administration |                 |                 |
|------------------------------------|------------------------------------------------|-----------------------------------------------|---------------------------|-----------------|-----------------|
|                                    |                                                |                                               | 24 h                      | 48 h            | 72 h            |
| B8 (Group A)                       | 30.0 $\pm$ 0.11                                | 102.1 $\pm$ 2.45                              | 29.5 $\pm$ 0.41           | 29.5 $\pm$ 0.60 | 29.1 $\pm$ 1.05 |
|                                    | 63.8%                                          | 100%                                          | 71.1%                     | 71.1%           | 71.4%           |
| B9 (Group B)                       | 31.2 $\pm$ 0.23                                | 106.1 $\pm$ 1.95                              | 28.2 $\pm$ 1.01           | 27.4 $\pm$ 0.55 | 27.2 $\pm$ 1.95 |
|                                    | 63.8%                                          | 100%                                          | 73.4%                     | 74.1%           | 74.3%           |
| B10 (Group C)                      | 29.8 $\pm$ 0.20                                | 85.9 $\pm$ 1.25                               | 37.4 $\pm$ 0.77           | 37.1 $\pm$ 0.31 | 37.1 $\pm$ 1.81 |
|                                    | 65.3%                                          | 100%                                          | 56.4%                     | 56.8%           | 56.8%           |
| B11 (Group D)                      | 29.1 $\pm$ 0.21                                | 81.5 $\pm$ 0.95                               | 35.9 $\pm$ 2.45           | 35.5 $\pm$ 1.41 | 35.4 $\pm$ 0.72 |
|                                    | 64.2%                                          | 100                                           | 55.9%                     | 56.4%           | 56.5%           |
| B12 (Group E)                      | 34.1 $\pm$ 1.09                                | 95.2 $\pm$ 3.33                               | 40.2 $\pm$ 0.30           | 35.5 $\pm$ 1.69 | 36.2 $\pm$ 1.42 |
|                                    | 64.1%                                          | 100                                           | 63.0%                     | 62.7%           | 61.9%           |
| B13 (Group F)                      | 32.1 $\pm$ 0.17                                | 97.5 $\pm$ 3.45                               | 31.5 $\pm$ 2.63           | 31.2 $\pm$ 0.13 | 31.3 $\pm$ 0.77 |
|                                    | 67.0%                                          | 100                                           | 67.6%                     | 68.0%           | 67.8%           |
| B14 (Group G)                      | 33.8 $\pm$ 1.15                                | 101.5 $\pm$ 2.50                              | 33.1 $\pm$ 2.50           | 32.9 $\pm$ 2.50 | 32.3 $\pm$ 2.50 |
|                                    | 66.6%                                          | 100                                           | 67.3%                     | 67.5%           | 68.1%           |

Note= Values represents mean  $\pm$  standard error of mean of 5 samples in each group (n= 5). Statistical analysis were done by using ANOVA.

**Table S16:**  $clogP$  values for ligands **B8–B14** calculated with ChemDraw 21.0, Molinspiration ([www.molinspiration.com](http://www.molinspiration.com)) and ALOGPS 2.1.<sup>1</sup>

| Compound   | $clogP$  |                |            |
|------------|----------|----------------|------------|
|            | ChemDraw | Molinspiration | ALOGPS 2.1 |
| <b>B8</b>  | 3.34     | 3.46           | 2.67       |
| <b>B9</b>  | 2.34     | 2.77           | 2.63       |
| <b>B10</b> | 0.35     | 1.31           | 1.06       |
| <b>B11</b> | 2.81     | 2.90           | 2.38       |
| <b>B12</b> | 2.59     | 2.92           | 2.10       |
| <b>B13</b> | 2.56     | 2.68           | 2.55       |
| <b>B14</b> | 2.55     | 2.68           | 2.53       |

**Table S17.** The calculated molecular properties used for the calculation of the quantitative estimate of drug-likeness (QED). MW (molecular weight),  $\text{clog}P$  for the compounds **B8–B14** and **Acarbose** using the average  $\log P$  of seven different programs via the ALOGPS 2.1 applet at <http://www.vcclab.org>. HBA (hydrogen bond acceptor), HBD (hydrogen bond donor), PSA (polar surface area) calculated via [www.molinspiration.com](http://www.molinspiration.com) or ChemDraw 21.0 software, ROTB (rotatable bonds), AROM (number of aromatic rings) and Alerts (number of structural alerts). Calculation of the weighted QED for maximum information content ( $\text{QED}_w^{\text{mo}}$ ) was carried out according to ref.<sup>2</sup>

| Compounds       | MW     | ALOGPS | HBA | HBD | PSA    | ROTB | AROM | Alerts | Unweighted<br>$\text{QED}_w^n$ | Weighted<br>$\text{QED}_w^{\text{mo}}$ |
|-----------------|--------|--------|-----|-----|--------|------|------|--------|--------------------------------|----------------------------------------|
| <b>B8</b>       | 282.29 | 2.67   | 5   | 0   | 66.13  | 3    | 2    | 1      | 0.835                          | 0.810                                  |
| <b>B9</b>       | 283.28 | 2.63   | 6   | 1   | 78.16  | 4    | 2    | 1      | 0.843                          | 0.869                                  |
| <b>B10</b>      | 206.20 | 1.31   | 5   | 0   | 66.13  | 2    | 1    | 1      | 0.727                          | 0.682                                  |
| <b>B11</b>      | 312.28 | 2.38   | 7   | 0   | 84.59  | 3    | 2    | 1      | 0.746                          | 0.804                                  |
| <b>B12</b>      | 312.28 | 2.10   | 7   | 1   | 103.43 | 4    | 2    | 1      | 0.767                          | 0.862                                  |
| <b>B13</b>      | 329.26 | 2.55   | 9   | 1   | 132.18 | 4    | 2    | 2      | 0.548                          | 0.663                                  |
| <b>B14</b>      | 329.26 | 2.53   | 9   | 1   | 132.18 | 4    | 2    | 2      | 0.548                          | 0.663                                  |
| <b>Acarbose</b> | 645.61 | -7.11  | 19  | 14  | 321.17 | 9    | 0    | 0      | 0.064                          | 0.111                                  |

## References

1. I. V. Tetko, J. Gasteiger, R. Todeschini, A. Mauri, D. Livingstone, P. Ertl, V. A. Palyulin, E. V. Radchenko, N. S. Zefirov, A. S. Makarenko, V. Y. Tanchuk and V. V. Prokopenko, *J. Comput. Aided Mol. Des.*, 2005, **19**, 453-463.
2. G. R. Bickerton, G. V. Paolini, J. Besnard, S. Muresan and A. L. Hopkins, *Nat. Chem.*, 2012, **4**, 90-98.
